# Repair of a Giant Ascending Aortic Pseudoaneurysm Requiring Awake Institution of Cardiopulmonary Bypass

Sarah A. Dunn, M.D., M.P.H., Oscar Aljure, M.D., Tomas Salerno, M.D., Yilam F. Rodriguez-Blanco, M.D.

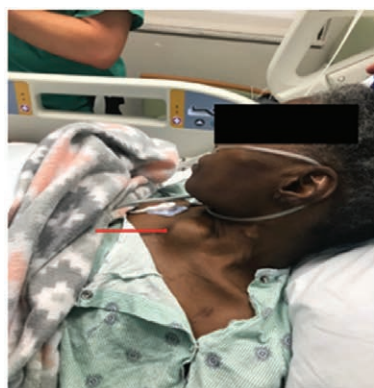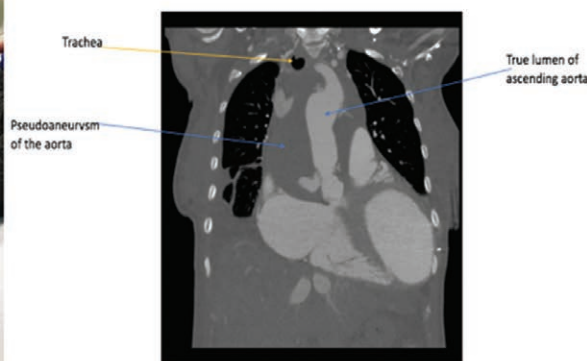

Ascending aortic pseudoaneurysms represent a unique and infrequent complication after type A dissection repair.<sup>1</sup> Massive aortic pseudoaneurysms can present as a large suprasternal pulsating mass with tracheal deviation as shown (*left and right panels*). Contrast-enhanced computerized tomography (*right panel*) demonstrates a  $10 \times 6.2 \times 13.4$ -cm pseudoaneurysm caused by mycotic infection of the aortic graft at the area of anastomosis from a type A dissection repair 3 yr before. Perioperative anesthetic considerations include extrinsic compression of surrounding structures, including the trachea and major vasculature.<sup>2</sup> Airway management of tracheal deviation caused by a pseudoaneurysm may include awake fiberoptic intubation, maintaining spontaneous respiration with an inhalational or intravenous induction, or initiating cardiopulmonary bypass before intubation.<sup>2,3</sup> Tracheal compression from pseudoaneurysms may be managed as above or by either orotracheal intubation distal to the obstruction or high-frequency jet ventilation across the stenosis, but the latter approach risks a fatal hemorrhage because compression of the trachea is caused by the pseudoaneurysm, which can rupture.<sup>3</sup> The pseudoaneurysm deviated the trachea and compressed both mainstem bronchi, as well as the right pulmonary artery (Supplemental Digital Content, <http://links.lww.com/ALN/B783>). Because of the risk of aneurysm rupture and inability to secure the airway, femoral–femoral cardiopulmonary bypass was instituted

while the patient was awake, and then anesthesia was induced and the airway secured.

## Competing Interests

The authors declare no competing interests.

## Correspondence

Address correspondence to Dr. Dunn: [sarah.dunn@jhsmiami.org](mailto:sarah.dunn@jhsmiami.org)

## References

1. Jain V, Gruberg L, Bilfinger TV, Tassiopoulos AK, Loh SA: Coil embolization of an aortic pseudoaneurysm after open repair of type A aortic dissection. *Ann Vasc Surg* 2014; 28:1312.e1–5
2. Henley MD, Farber MA, Ikonomidis JS, Kolarczyk LM, Teeter EG, Barrick BP, Caranasos TG, Martinelli SM: A tale of three surgeries: Management of a massive recurrent mycotic aortic pseudoaneurysm. *J Cardiothorac Vasc Anesth* 2018; 32:550–7
3. Nishiwaki K, Komatsu T, Shimada Y, Takeuchi E, Abe T: Severe tracheal compression caused by false aneurysm arising from the ascending aorta: Successful airway management using induced hypotension and bronchoscopy. *ANESTHESIOLOGY* 1990; 73:1047–9

Supplemental Digital Content is available for this article. Direct URL citations appear in the printed text and are available in both the HTML and PDF versions of this article. Links to the digital files are provided in the HTML text of this article on the Journal's Web site ([www.anesthesiology.org](http://www.anesthesiology.org)).

From Jackson Memorial Hospital, Miami, Florida (S.A.D.); and University of Miami/Jackson Memorial Hospital, Miami, Florida (O.A., T.S., Y.F.R.-B.).

Copyright © 2018, the American Society of Anesthesiologists, Inc. Wolters Kluwer Health, Inc. All Rights Reserved. *Anesthesiology* 2019; 130:152
